# Supplementary material
Source: PubMed Central journal article supplement (PMC2535916)
Supplement: NIHMS63326-supplement-3si20060110_05.pdf [file NIHMS63326-supplement-3si20060110_05.pdf]

# Supporting Information

## Functional Lactide Monomers: Methodology and Polymerization

*Warren W. Gerhardt<sup>1</sup>, David E. Noga<sup>1</sup>, Kenneth I. Hardcastle<sup>3</sup>, Andrés J. García<sup>2</sup>,  
David M. Collard<sup>1,\*</sup>, and Marcus Weck<sup>1,\*</sup>*

*<sup>1</sup>School of Chemistry and Biochemistry and <sup>2</sup>Woodruff School of Mechanical Engineering and  
Institute for Bioengineering and Bioscience, Georgia Institute of Technology, Atlanta, Georgia  
30332-0400*

*<sup>3</sup>X-Ray Crystallographic Center, Department of Chemistry, Emory University,  
Atlanta, GA 30322*

### **General Experimental Details.**

H-Ser (Benzyl)-OH was purchased from Indofine Chemical Company. H-Glu(O-Benzyl)-OH was purchased from 3B Medical Systems. H-Lys(Z)-OH was purchased from Fluka. N,N-Diisopropylethyl amine (DIEA) was distilled from CaH<sub>2</sub>. Diethyl ether and benzene were distilled from metallic sodium and benzophenone, acetone from 4Å molecular sieves, and CH<sub>2</sub>Cl<sub>2</sub> was dried via passage through Cu<sub>2</sub>O and alumina columns. All anhydrous liquids brought into the nitrogen-filled glove box were first degassed with three freeze-pump-thaw cycles using liquid nitrogen at 50 mmHg. Chromatography was performed with Sorbent Tech

Premium Grade silica: porosity 60 Å, particle size 40-75 µm (200×400 mesh), surface area 450-550 m<sup>2</sup>/g, pH range 6-8., decomposition of cyclic monomer **1** was observed during chromatography using Sorbent Tech Standard Grade silica: porosity 60 Å, particle size 32-63 µm (230×450 mesh), surface area 500-600 m<sup>2</sup>/g, pH range 6.5-7.5. Compounds were analyzed by use of UV light (254 nm), I<sub>2</sub>, or a 5% solution of ammonium molybdate in 2 M sulfuric acid. Chemical shifts are reported in parts per million (ppm), using residual solvent as an internal standard.
